# Supplementary material for: Theoretical study of the binding profile of an allosteric modulator NS-1738 with a chimera structure of the α7 nicotinic acetylcholine receptor
Source: Royal Society of Chemistry journal article supplement (doi:10.1039/c6cp02278b), 2016-01-01
Supplement: c6cp02278b1.pdf [file c6cp02278b1.pdf]

## Supporting Information of

# Theoretical Study of the Binding Profile of the Allosteric Modulator NS-1738 with a Chimera Structure of the $\alpha 7$ Nicotinic Acetylcholine Receptor

Guanglin Kuang,<sup>a</sup> Xu Wang,<sup>a</sup> Christer Halldin,<sup>b</sup> Agneta Nordberg,<sup>c</sup> Bengt Långström,<sup>d</sup> Hans Ågren<sup>a</sup> and Yaoquan Tu<sup>a\*</sup>

<sup>a.</sup> *Division of Theoretical Chemistry and Biology, School of Biotechnology, Royal Institute of Technology (KTH), AlbaNova University Center, S-106 91, Stockholm, Sweden*

<sup>b.</sup> *Karolinska Institutet, Department of Clinical Neuroscience, Centre for Psychiatric Research, 171 76, Stockholm, Sweden*

<sup>c.</sup> *Department of Neurobiology, Care Sciences and Society, Center of Alzheimer Research, Translational Alzheimer Neurobiology, Karolinska University Hospital, Huddinge, S-141 86, Stockholm, Sweden*

<sup>d.</sup> *Department of Chemistry, Uppsala University, 751 23 Uppsala, Sweden*

\* *E-mail: yaoquan@kth.se.*

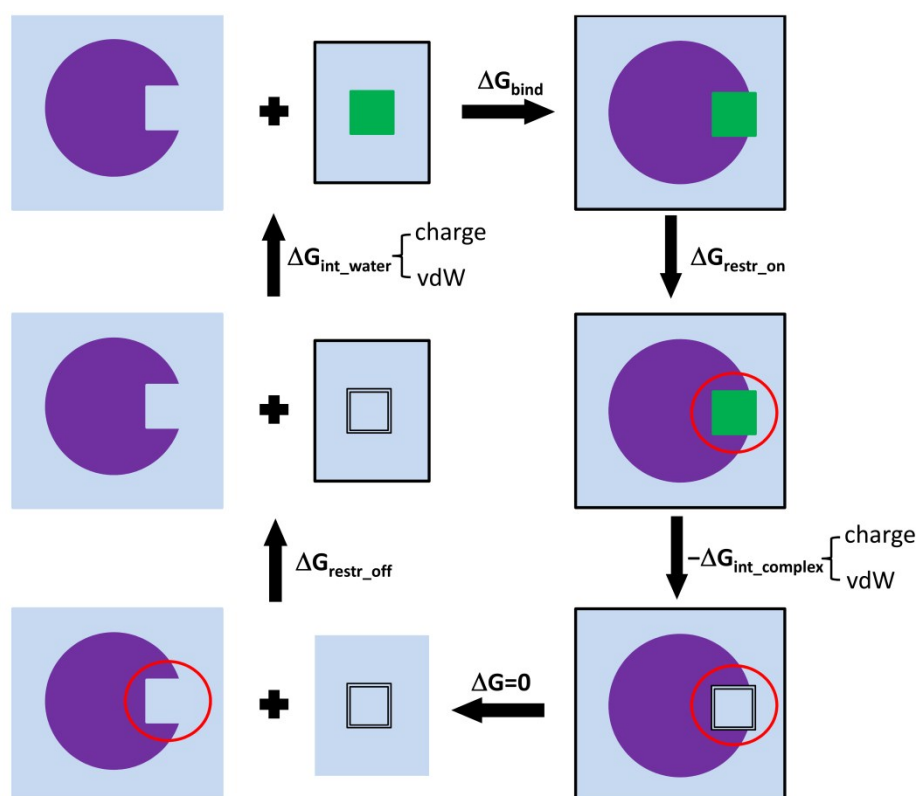

**Supplementary Fig. S1.** The thermodynamic cycle used to calculate the absolute binding free energy. In this diagram, the protein is shown in a circular shape with a breach, which represents the binding pocket. The ligand is shown as a green square when full interactions are present and as a transparent square when the electrostatic and van der Waals interactions are decoupled. The light blue background represents the water. The red circle means restraints are applied. The black surrounding box means simulation is implemented for that system. In the left column only the ligand was simulated, whereas in the right column both the protein and the ligand were simulated.

**Supplementary Table S1.** The reference atoms and reference values for the restraints used to keep the ligand in the binding pocket of the protein. For the ligand the reference atoms (L1, L2 and L3) are the same in each system, whereas for the protein the reference atoms (P1, P2 and P3), which are the heavy atoms close to the ligand, are dependent on the binding mode. The details of the calculation of the contribution of the restraints to the binding free energy are given in the Method section of the manuscript.

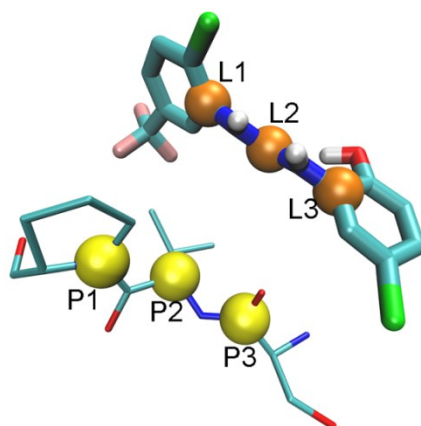

| Binding Site       | Binding Mode | Protein Reference Atoms               | $d^*$ (nm) | $\theta_1$ (degree) | $\theta_2$ (degree) | $\phi_1$ (degree) | $\phi_2$ (degree) | $\phi_3$ (degree) |
|--------------------|--------------|---------------------------------------|------------|---------------------|---------------------|-------------------|-------------------|-------------------|
| Top pocket         | T1           | P1: L6 CA<br>P2: Y7 N<br>P3: Y7 CB    | 0.62       | 122.44              | 67.98               | -151.22           | -44.12            | -96.54            |
|                    | T2           | P1: L6 CA<br>P2: Y7 N<br>P3: Y7 CB    | 0.6        | 108.47              | 64.65               | 41.26             | -85.07            | -126.12           |
|                    | T3           | P1: S77 C<br>P2: V78 CA<br>P3: P79 N  | 0.49       | 91.2                | 84.53               | 92.05             | -177.35           | 97.11             |
|                    | T4           | P1: L10 CA<br>P2: V11 N<br>P3: V11 C  | 0.5        | 66.62               | 89.51               | 9.77              | -146.5            | 138.4             |
| Vestibule pocket   | V1           | P1: L88 N<br>P2: L88 C<br>P3: A89 CA  | 0.47       | 60.12               | 95.51               | -64.28            | -81.77            | -143.64           |
|                    | V2           | P1: L88 CB<br>P2: L88 C<br>P3: A89 CA | 0.46       | 91.42               | 94.23               | 3.77              | -174.73           | 109.78            |
| Agonist sub-pocket | A1           | P1: Y91 N<br>P2: N91 C<br>P3: N92 CA  | 0.52       | 61.83               | 145.6               | 73.6              | 170.94            | -172.15           |

\* The distance ( $d$ ), angles ( $\theta_1$  and  $\theta_2$ ), dihedrals ( $\phi_1$ ,  $\phi_2$  and  $\phi_3$ ) are defined as:

$d$ : L2—P2;

$\theta_1$ : L1—L2—P2;

$\theta_2$ : P1—P2—L2;

$\phi_1$ : L1—L2—L3—P2;

$\phi_2$ : L1—L2—P2—P1;

$\phi_3$ : P1—P2—P3—L2.
